# Supplementary material
Source: PubMed Central journal article supplement (PMC4740917)
Supplement: NIHMS737209-supplement-supplement_1.pdf [file NIHMS737209-supplement-supplement_1.pdf]

## eAppendix 1

**Table 1.** Comparison of Models Predicting Fall-Related Injuries Using AIC and BIC

| Model                                                                   | AIC <sup>a</sup> | Change in AIC      | BIC <sup>b</sup> | Change in BIC      |
|-------------------------------------------------------------------------|------------------|--------------------|------------------|--------------------|
| Base model (age, gender)                                                | 2156.4           |                    | -11088.0         |                    |
| 1) Base + Elixhauser comorbidity count                                  | 2133.7           | -22.7 <sup>c</sup> | -11099.7         | -11.7 <sup>c</sup> |
| 2) Base + Elixhauser comorbidity count + prior FRI                      | 2126.1           | -7.6 <sup>d</sup>  | -11101.8         | -2.1 <sup>d</sup>  |
| 3) Base + Elixhauser comorbidity count + screening question             | 2115.4           | -18.3 <sup>d</sup> | -11112.5         | -12.8 <sup>d</sup> |
| 4) Base + Elixhauser comorbidity count + screening question + prior FRI | 2112.3           | -3.1 <sup>e</sup>  | -11110.1         | +2.4 <sup>e</sup>  |

AIC indicates Akaike information criterion; BIC, Bayesian information criterion; FRI, fall-related injury.

<sup>a</sup>Akaike Information Criterion (AIC) is a likelihood measure in which lower values indicate better fit and a penalty is paid for increasing the number of variables in the model.<sup>1</sup>

<sup>b</sup>Bayesian Information Criterion (BIC) is a likelihood measure in which lower values indicate better fit, and a stronger penalty is paid for increasing the model parameters than with AIC.<sup>2</sup>

<sup>c</sup>Change in AIC or BIC from the base model.

<sup>d</sup>Change in AIC or BIC from model 1.

<sup>e</sup>Change in AIC or BIC from model 3.

**Table 2.** Comparison of Models Predicting Fall-Related Injuries by Relative Likelihood of Better Fit

| Model | AIC <sup>a</sup> | Change in AIC      | Relative Likelihood of Better Fit <sup>b</sup> |
|-------|------------------|--------------------|------------------------------------------------|
| Base  | 2156.4           |                    |                                                |
| 1     | 2133.7           | -22.7 <sup>c</sup> | 0.00001<br>(base model compared with model 1)  |
| 2     | 2126.1           | -7.6 <sup>d</sup>  | 0.02<br>(model 1 compared with model 2)        |
| 3     | 2115.4           | -18.3 <sup>d</sup> | 0.0001<br>(model 1 compared with model 3)      |
| 4     | 2112.3           | -3.1 <sup>e</sup>  | 0.21<br>(model 3 compared with model 4)        |

AIC indicates Akaike information criterion; FRI, fall-related injury.

<sup>a</sup>Akaike Information Criterion (AIC) is a likelihood measure in which lower values indicate better fit and a penalty is paid for increasing the number of variables in the model.<sup>1</sup>

<sup>b</sup>Relative likelihood of better fit of the model =  $\exp((AIC_{\min} - AIC)/2)$  where  $AIC_{\min}$  is the minimum AIC.<sup>3</sup>

<sup>c</sup>Change in AIC from base model.

<sup>d</sup>Change in AIC from model 1.

<sup>e</sup>Change in AIC from model 3.

## eAppendix 2

### Model 1. Predicted vs Observed Fall-Related Injuries by Decile

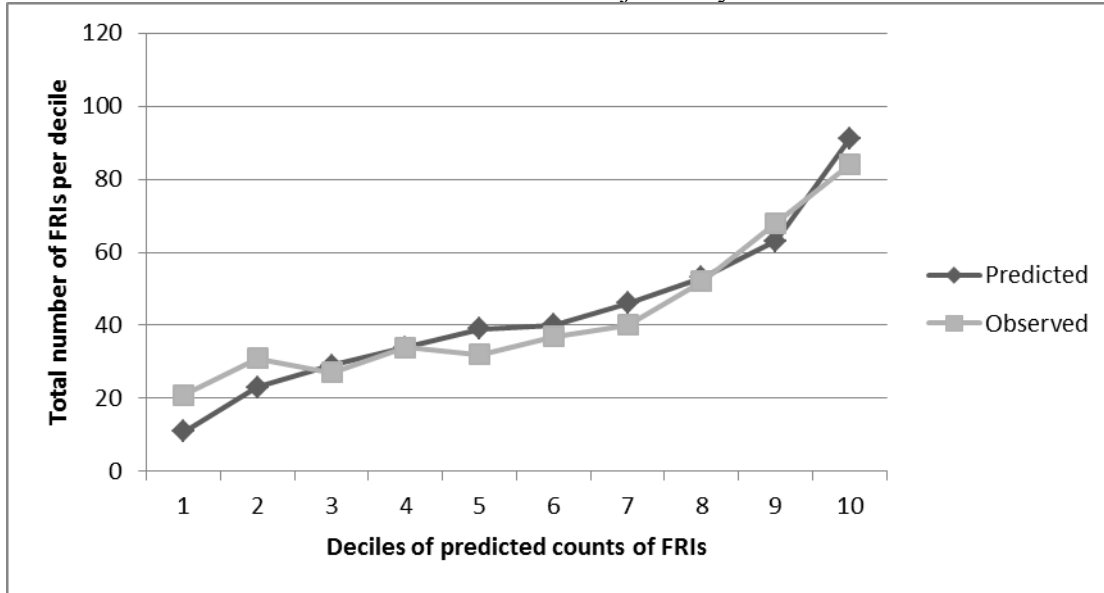

FRI indicates fall-related injury.

Predicted and observed counts calculated using model that includes age, gender, and Elixhauser comorbidity count (Model 1 in Table 3).

### Model 2. Predicted vs Observed Fall-Related Injuries by Decile

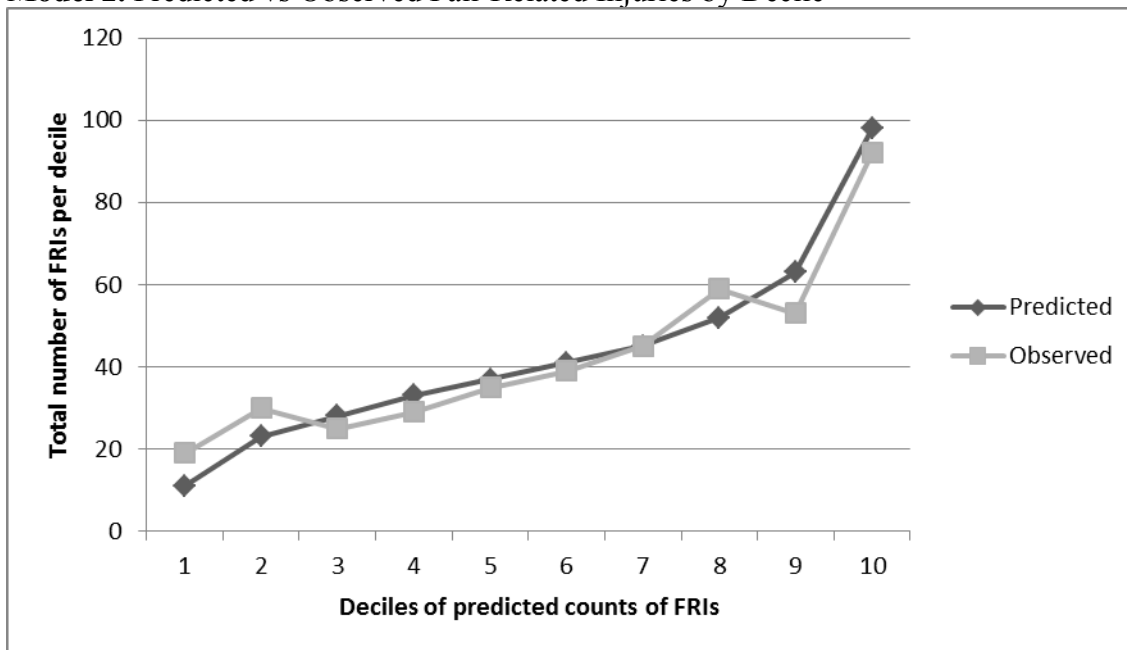

FRI indicates fall-related injury.

Predicted and observed counts calculated using model that includes age, gender, Elixhauser comorbidity count, and prior claim for FRI (Model 2 in Table 3).

**Model 3. Predicted vs Observed Fall-Related Injuries by Decile**

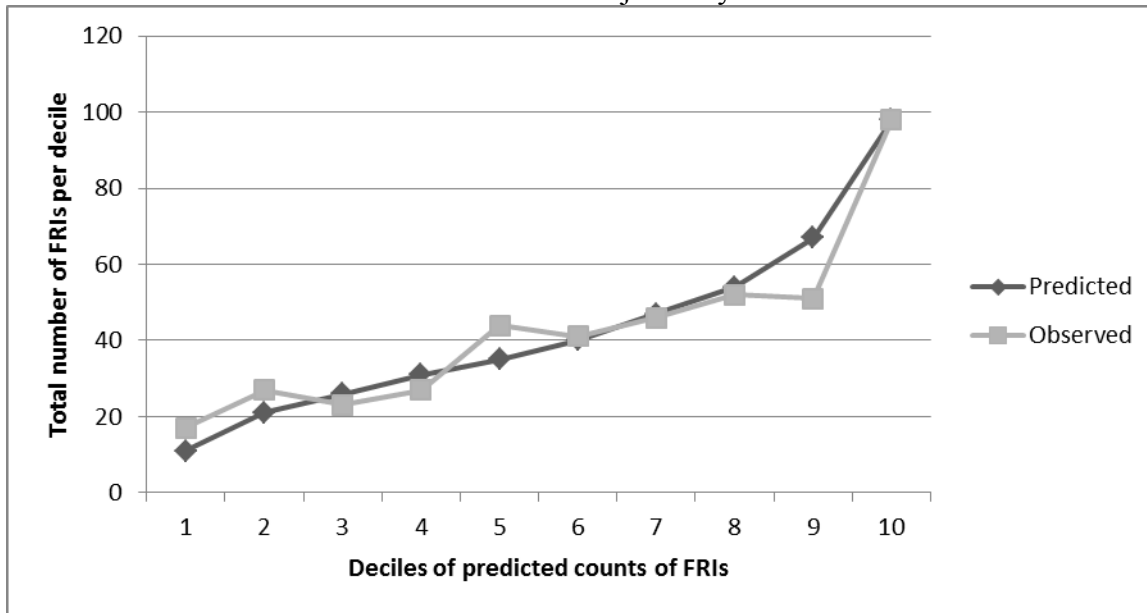

FRI indicates fall-related injury.

Predicted and observed counts calculated using model that includes age, gender, Elixhauser comorbidity count, and screening question ( $\geq 2$  falls in the past year) (Model 3 in Table 3).

**Table 3.** Comparison of Observed vs Predicted Fall-Related Injuries by Model

| Model |                                                           | Hosmer-Lemeshow $\chi^2$ Test Statistics | <i>P</i> |
|-------|-----------------------------------------------------------|------------------------------------------|----------|
| 1     | Base (age, gender) + comorbidity count                    | 15.25                                    | .05      |
| 2     | Base + comorbidity count + prior FRI                      | 12.41                                    | .13      |
| 3     | Base + comorbidity count + screening question             | 12.43                                    | .13      |
| 4     | Base + comorbidity count + screening question + prior FRI | 18.74                                    | .02      |

Graphically, observed and predicted fall-related injuries are similar in all models. Significant or near-significant Hosmer-Lemeshow test statistics for Models 1 and 4 may be in part related to large sample size.<sup>4</sup>

### eAppendix 3

The eAppendix Figures show scatter plots of residual values versus predicted fall-related injuries for individual patients (blue circles) as well as locally weighted polynomial regression (LOESS) smoothing curves (solid black lines) with 95% CIs (dashed lines) for each model.<sup>5</sup> For all models, the LOESS curves show residuals centered around 0 except for the few subjects with high predicted values.

#### Model 1

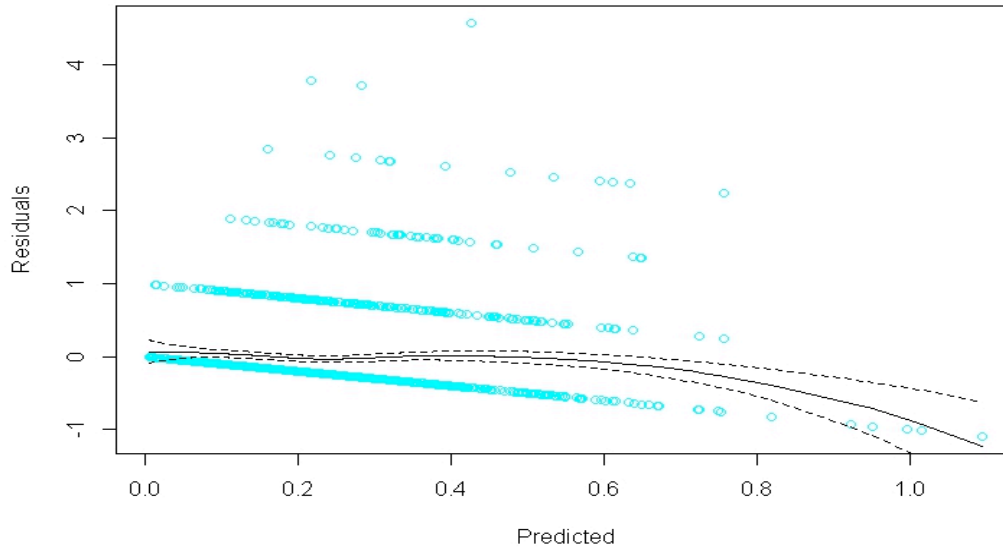

Predicted counts and residuals calculated using model that includes age, gender, and Elixhauser comorbidity count (Model 1 in Table 3).

#### Model 2

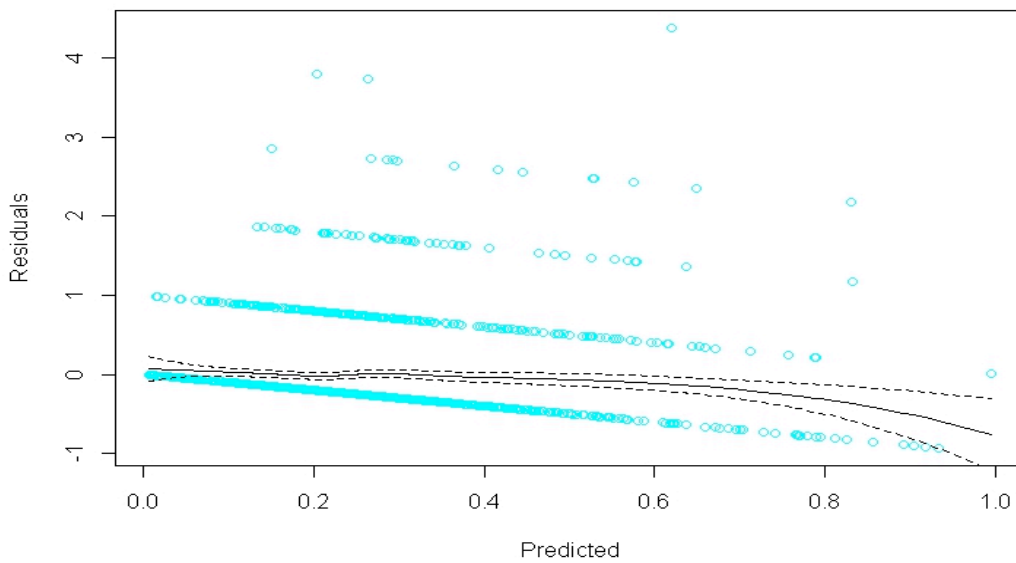

Predicted counts and residuals calculated using model that includes age, gender, Elixhauser comorbidity count, and prior claim for fall-related injury (Model 2 in Table 3).

### Model 3

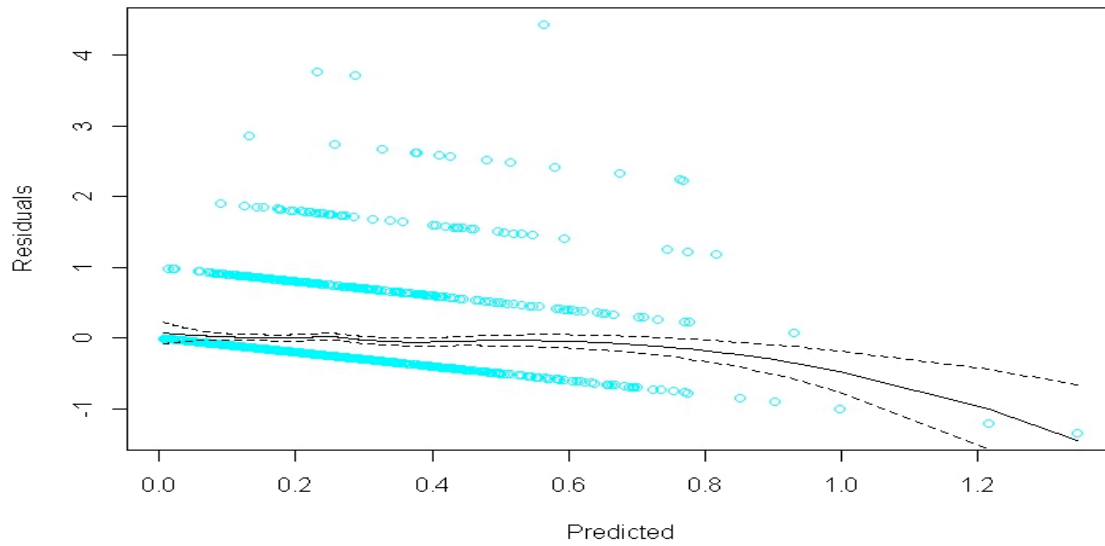

Predicted counts and residuals calculated using model that includes age, gender, Elixhauser comorbidity count, and screening question ( $\geq 2$  falls in the past year) (Model 3 in Table 3).

### Model 4

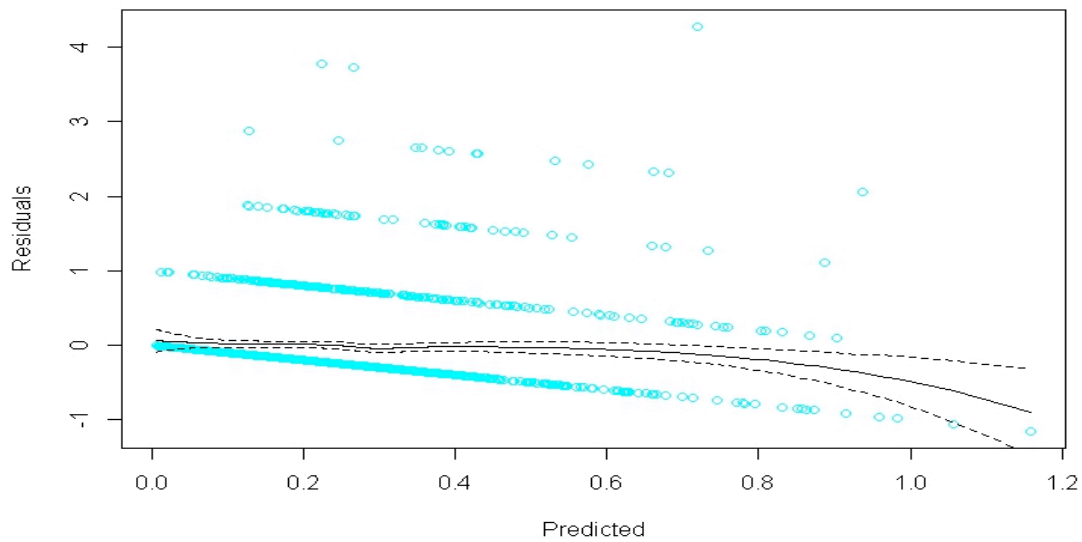

Predicted counts and residuals calculated using model that includes age, gender, Elixhauser comorbidity count, screening question ( $\geq 2$  falls in the past year), and prior claim for fall-related injury (Model 4 in Table 3).

## eAPPENDIX REFERENCES

1. Akaike H. A new look at the statistical model identification. *IEEE Trans Automat Contr.* 1974;19(6):716-723.
2. Raftery AE. Approximate Bayes factors and accounting for model uncertainty in generalized linear models. *Biometrika.* 1996;83(2):251-266.
3. Burnham KP, Anderson DR. *Model Selection and Multimodel Inference: A Practical Information-Theoretic Approach.* 2nd ed. New York, NY: Springer-Verlag; 2003.
4. Hosmer DW, Lemeshow S. *Applied Logistic Regression.* 2nd ed. New York, NY: Wiley-Interscience Publication; 2000.
5. Cleveland WS. Robust locally weighted regression and smoothing scatterplots. *JASA.* 1979;74(368):829-836.
